# Supplementary material
Source: publisher site journal article supplement (https://www.dovepress.com/get_supplementary_file.php?f=274615.docx)

**Supplemental figure 1** **MAFG-AS1 promoted the expression of** **DICER and Drosha in U87 and U-188 cells. *,p<0.05.**


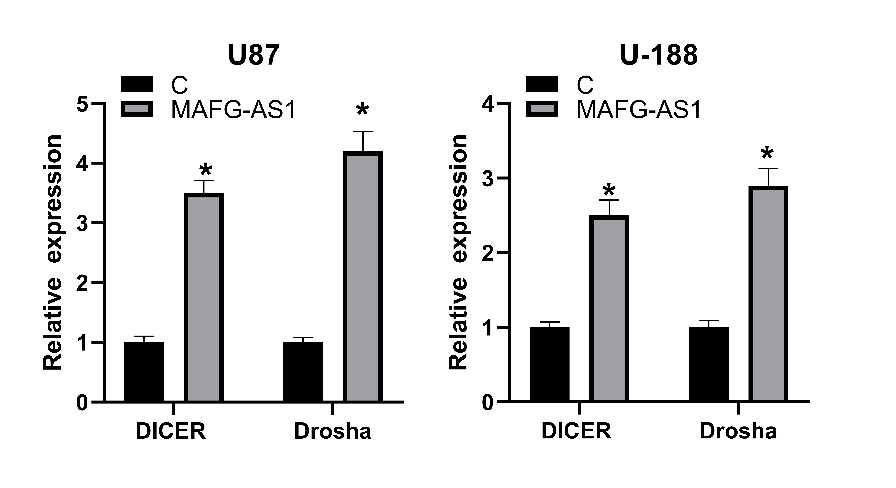


**Supplemental figure 2 MAFG-AS1 overexpression did not affect the apoptosis and cell cycle of GBM cells**

**Flow cytometry was performed to analyze the roles of MAFG-AS1 and miR-34a in regulating the** **apoptosis (A) and cell cycle (B) of U87 and U-118 cells.**


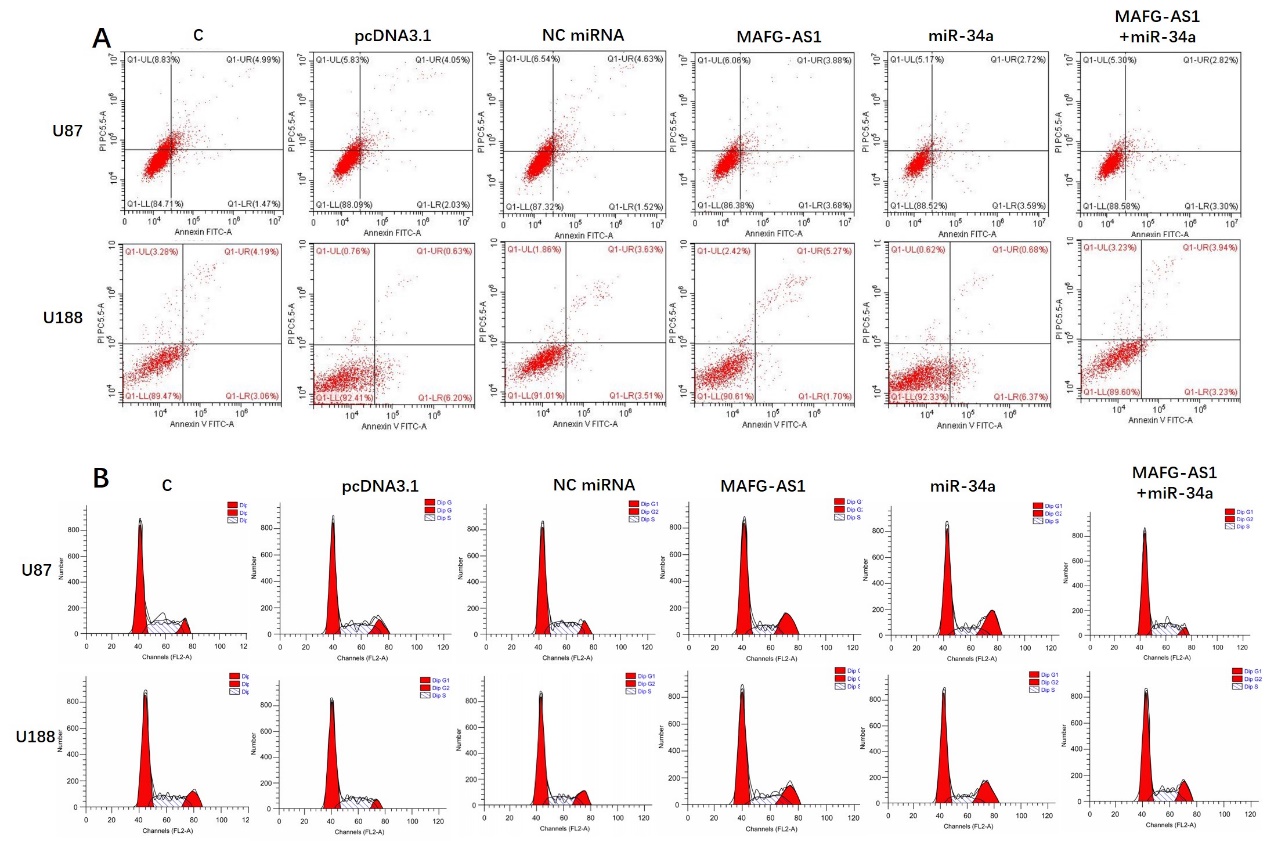


**Supplemental figure 3 MAFG-AS1 overexpression did not affect the migration of GBM cells**

**A cell scratch experiment was performed to analyze the roles of MAFG-AS1 and miR-34a in regulating the migration of U87 and U-118 cells.**


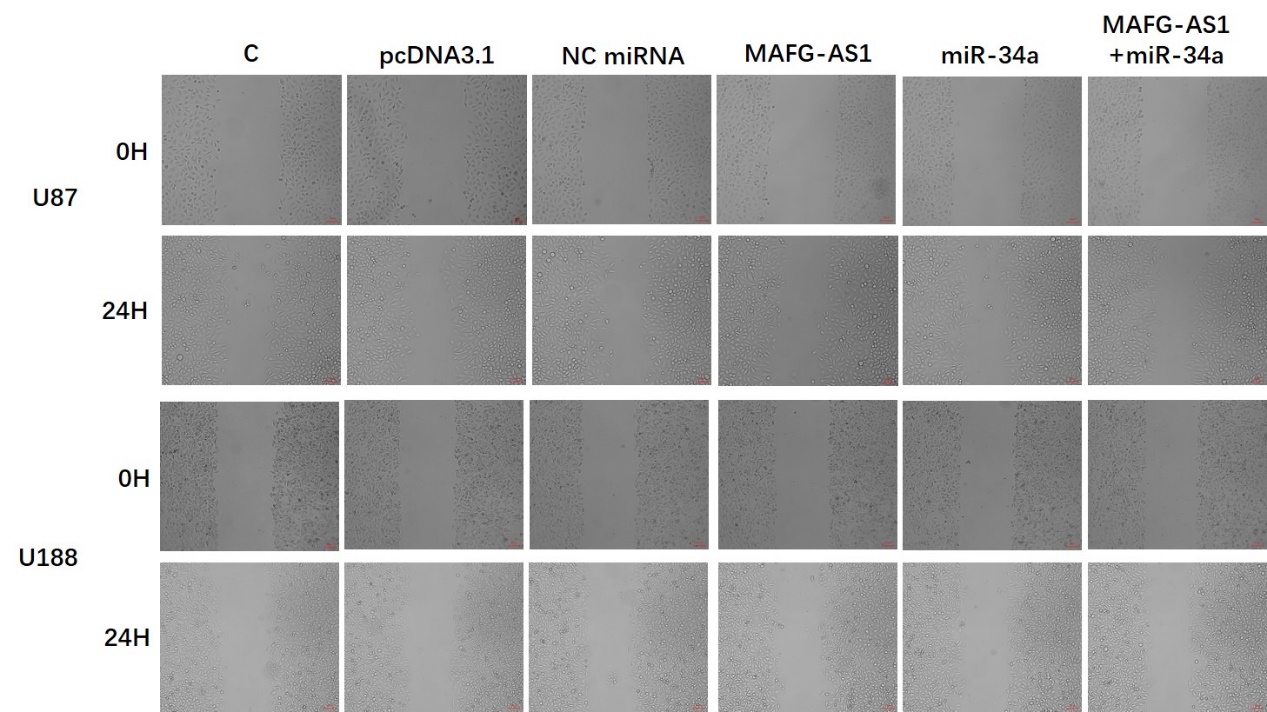

Supplement: Supplementary file 1 [file get_supplementary_file.php]
